# Supplementary material for: A Reverse Taxonomic Approach to Assess Macrofaunal Distribution Patterns in Abyssal Pacific Polymetallic Nodule Fields
Source: PLoS One. 2015 Feb 11;10(2):e0117790. doi: 10.1371/journal.pone.0117790 (PMC4324633; doi:10.1371/journal.pone.0117790)
Supplement: S4 Table — (DOCX) [file pone.0117790.s004.docx]

Electronic supplementary material to:

A reverse taxonomic approach to assess macrofaunal distribution patterns in abyssal Pacific polymetallic nodule fields

Annika Janssen1*, Stefanie Kaiser1,Karin Meißner2,Nils Brenke1, Lenaick Menot3, Pedro Martínez Arbízu1

S4 Table: Isopod MOTUs present in the French and German license area including morphological determination; la1= license area, g=German license area, f = French license area, seq. ident.2 = sequence identity,* = reference sequence.

| **clsno.** | **species ID** | **EBS#** | **exped.** | **la** | **family** | ***genus*** | ***species*** | **seq id.**  **(in %)** |
| --- | --- | --- | --- | --- | --- | --- | --- | --- |
| 0 | | NB-Iso1 | 06 | BioNod´12 | g | Macrostylidae | *Macrostylis* | sp.7 sp.nov. | 98 | | --- | --- | --- | --- | --- | --- | --- | --- | | NB-Iso2 | 06 | BioNod´12 | g | Macrostylidae | *Macrostylis* | indet | 98 | | NB-Iso3 | 06 | BioNod´12 | g | Macrostylidae | *Macrostylis* | sp.7 sp.nov. | 98 | | NB-Iso5 | 06 | BioNod´12 | g | Macrostylidae | *Macrostylis* | sp.7 sp.nov. | 98 | | NB-Iso343 | 43 | BioNod´12 | g | Macrostylidae | *Macrostylis* | sp.7 sp.nov. | * | | NB-Iso344 | 43 | BioNod´12 | g | Macrostylidae | *Macrostylis* | indet | 98 | | NB-Iso345 | 43 | BioNod´12 | g | Macrostylidae | *Macrostylis* | sp.7 sp.nov. | 100 | | NB-Iso347 | 43 | BioNod´12 | g | Macrostylidae | *Macrostylis* | indet | 99 | | | | | | | | |
| 1 | | NB-Iso41 | 06 | BioNod´12 | g | Haploniscidae | *Mastigoniscus* | sp.9 | 99 | | --- | --- | --- | --- | --- | --- | --- | --- | | NB-Iso64 | 16 | BioNod´12 | g | Haploniscidae | *Mastigoniscus* | sp.4 | * | | NB-Iso78 | 33 | BioNod´12 | g | Haploniscidae | *Mastigoniscus* | sp.4. | 99 | | NB-Iso79 | 33 | BioNod´12 | g | Haploniscidae | *Mastigoniscus* | sp.9 | 99 | | NB-Iso43 | 06 | BioNod´12 | g | Haploniscidae | *Mastigoniscus* | sp.9 | 99 | | | | | | | | |
|  | NB-Iso81 | 33 | BioNod´12 | g | Haploniscidae | *Mastigoniscus* | sp.9 | 99 |
| 2 | | NB-Iso74 | 33 | BioNod´12 | g | Macrostylidae | *Macrostylis* | sp.5 sp.nov. | * | | --- | --- | --- | --- | --- | --- | --- | --- | | NB-Iso75 | 33 | BioNod´12 | g | Macrostylidae | *Macrostylis* | sp.5 sp.nov. | 100 | | NB-Iso8 | 06 | BioNod´12 | g | Macrostylidae | *Macrostylis* | indet | 97 | | NB-Iso4 | 06 | BioNod´12 | g | Macrostylidae | *Macrostylis* | indet | 97 | | NB-Iso76 | 33 | BioNod´12 | g | Macrostylidae | *Macrostylis* | sp.5 sp.nov. | 97 | | | | | | | | |
| 3 | | NB-Iso192 | 80 | BioNod´12 | f | Macrostylidae | *Macrostylis* | sp.5 sp.nov. | * | | --- | --- | --- | --- | --- | --- | --- | --- | | NB-Iso194 | 80 | BioNod´12 | f | Macrostylidae | *Macrostylis* | sp.5 sp.nov. | 98 | | NB-Iso195 | 80 | BioNod´12 | f | Macrostylidae | *Macrostylis* | sp.5 sp.nov. | 98 | | NB-Iso210 | 80 | BioNod´12 | f | Macrostylidae | *Macrostylis* | indet | 98 | | NB-Iso441 | 101 | BioNod´12 | f | Macrostylidae | *Macrostylis* | sp.5 sp.nov. | 98 | | | | | | | | |
| 4 | | NB-Iso197 | 80 | BioNod´12 | f | Macrostylidae | *Macrostylis* | sp.3 sp.nov. | * | | --- | --- | --- | --- | --- | --- | --- | --- | | NB-Iso204 | 80 | BioNod´12 | f | Macrostylidae | *Macrostylis* | sp.5 sp.nov. | 98 | | NB-Iso264 | 73 | BioNod´12 | f | Macrostylidae | *Macrostylis* | sp.5 sp.nov. | 99 | | NB-Iso515 | 101 | BioNod´12 | f | Macrostylidae | *Macrostylis* | sp.5 sp.nov. | 97 | | | | | | | | |
| 5 | | NB-Iso253 | 73 | BioNod´12 | f | Dendrotionidae | *cf Dendrotion* | aff. *thylogale* | * | | --- | --- | --- | --- | --- | --- | --- | --- | | NB-Iso256 | 73 | BioNod´12 | f | Dendrotionidae | *cf Dendrotion* | aff. *thylogale* | 99 | | NB-Iso458 | 101 | BioNod´12 | f | Dendrotionidae | *cf Dendrotion* | aff. *thylogale* | 99 | | | | | | | | |
| 6 | | NB-Iso245 | 73 | BioNod´12 | f | Munnopsidae | *Acanthocope* | *galatheae* | * | | --- | --- | --- | --- | --- | --- | --- | --- | | NB-Iso454 | 101 | BioNod´12 | f | Munnopsidae | *Acanthocope* | *galatheae* | 99 | | NB-Iso243 | 73 | BioNod´12 | f | Munnopsidae | *Acanthocope* | *galatheae* | 99 | | | | | | | | |
| 7 | | NB-Iso112 | 67 | BioNod´12 | f | Munnopsidae | *Betamorpha* | sp.1 | * | | --- | --- | --- | --- | --- | --- | --- | --- | | NB-Iso168 | 80 | BioNod´12 | f | Munnopsidae | *Betamorpha* | aff. *profunda* | 100 | | NB-Iso170 | 80 | BioNod´12 | f | Munnopsidae | *Betamorpha* | aff. *profunda* | 100 | | | | | | | | |
| 8 | | NB-Iso114 | 67 | BioNod´12 | f | Desmosomatidae | *Prochelator* | sp.2 | 99 | | --- | --- | --- | --- | --- | --- | --- | --- | | NB-Iso 230 | 73 | BioNod´12 | f | Desmosomatidae | *Prochelator* | sp.2 | 100 | | NB-Iso 236b | 73 | BioNod´12 | f | Desmosomatidae | *Prochelator* | sp.2 | * | | | | | | | | |
| 9 | | NB-Iso307 | 43 | BioNod´12 | g | Nannoniscidae | *cf. Nannoniscus* | sp. 2 | * | | --- | --- | --- | --- | --- | --- | --- | --- | | NB-Iso310 | 43 | BioNod´12 | g | Nannoniscidae | *cf. Nannoniscus* | sp. 2 | 99 | | NB-Iso303 | 43 | BioNod´12 | g | Nannoniscidae |  |  | 98 | | | | | | | | |
| 10 | | NB-Iso136 | 80 | BioNod´12 | f | Desmosomatidae | *Mirabilicoxa* | sp. 1 | * | | --- | --- | --- | --- | --- | --- | --- | --- | | NB-Iso216 | 73 | BioNod´12 | f | Desmosomatidae | *Mirabilicoxa* | sp. 1 | 100 | | NB-Iso228 | 73 | BioNod´12 | f | Desmosomatidae | *Mirabilicoxa* | sp. 1 | 99 | | | | | | | | |
| 11 | | NB-Iso82 | 33 | BioNod´12 | g | Desmosomatidae | *Chelator* | sp. 1 | * | | --- | --- | --- | --- | --- | --- | --- | --- | | NB-Iso83 | 33 | BioNod´12 | g | Desmosomatidae | *Chelator* | sp. 1 | 99 | | | | | | | | |
| 12 | | NB-Iso95 | 67 | BioNod´12 | f | Macrostylidae | *Macrostylis* | sp.5 sp.nov. | * | | --- | --- | --- | --- | --- | --- | --- | --- | | NB-Iso193 | 80 | BioNod´12 | f | Macrostylidae | *Macrostylis* | sp.5 sp.nov. | 99 | | | | | | | | |
| 13 | | NB-Iso444 | 101 | BioNod´12 | f | Munnopsidae | *cf. Eurycope* | *scabra* | * | | --- | --- | --- | --- | --- | --- | --- | --- | | NB-Iso460 | 101 | BioNod´12 | f | Munnopsidae |  | indet | 98 | | | | | | | | |
| 14 | | NB-Iso353 | 43 | BioNod´12 | g | Haplomunnidae | *Thylakogaster* | sp.1 | 100 | | --- | --- | --- | --- | --- | --- | --- | --- | | NB-Iso354 | 43 | BioNod´12 | g | Haplomunnidae | *Thylakogaster* | sp.1 | * | | | | | | | | |
| 15 | | NB-Iso100 | 67 | BioNod´12 | f | Haploniscidae | *Haploniscus* | aff. *intermedius* | * | | --- | --- | --- | --- | --- | --- | --- | --- | | NB-Iso105 | 67 | BioNod´12 | f | Haploniscidae | *Haploniscus* | aff. *intermedius* | 99 | | | | | | | | |
| 16 | | NB-Iso104 | 67 | BioNod´12 | f | Haploniscidae | *Haploniscus* | aff. *intermedius* | * | | --- | --- | --- | --- | --- | --- | --- | --- | | NB-Iso268 | 73 | BioNod´12 | f | Haploniscidae | *Haploniscus* | aff. *intermedius* | 100 | | | | | | | | |
| 17 | | NB-Iso101 | 67 | BioNod´12 | f | Haploniscidae | *Haploniscus* | aff. *intermedius* | * | | --- | --- | --- | --- | --- | --- | --- | --- | | NB-Iso103 | 67 | BioNod´12 | f | Haploniscidae | *Haploniscus* | aff. *intermedius* | 99 | | | | | | | | |
| 18 | | NB-Iso42 | 06 | BioNod´12 | g | Haploniscidae | *Mastigoniscus* | sp.9 | * | | --- | --- | --- | --- | --- | --- | --- | --- | | NB-Iso45 | 06 | BioNod´12 | g | Haploniscidae | *Mastigoniscus* | sp.9 | 99 | | | | | | | | |
| 19 | | NB-Iso111 | 67 | BioNod´12 | f | Munnopsidae | *Eurycope* | aff. *linearis* | * | | --- | --- | --- | --- | --- | --- | --- | --- | | NB-Iso276 | 43 | BioNod´12 | g | Munnopsidae | *Eurycope* | aff. *linearis* | 97 | | | | | | | | |
| 20 | | NB-Iso241 | 73 | BioNod´12 | f | Munnopsidae | *Eurycope* | aff. *linearis* | 99 | | --- | --- | --- | --- | --- | --- | --- | --- | | NB-Iso497 | 101 | BioNod´12 | f | Munnopsidae | *Eurycope* | aff*. linearis* | * | | | | | | | | |
| 21 | | NB-Iso284 | 43 | BioNod´12 | g | Munnopsidae | *Eurycope* | sp.6 | * | | --- | --- | --- | --- | --- | --- | --- | --- | | NB-Iso285 | 43 | BioNod´12 | g | Munnopsidae | *Eurycope* | sp.6 | 99 | | | | | | | | |
| 22 | | NB-Iso38 | 06 | BioNod´12 | g | Desmosomatidae | *Eugerdella* | sp. 1 | * | | --- | --- | --- | --- | --- | --- | --- | --- | | NB-Iso56 | 16 | BioNod´12 | g | Desmosomatidae | *Eugerdella* | sp. 1 | 99 | | | | | | | | |
| 23 | | NB-Iso226 | 73 | BioNod´12 | f | Desmosomatidae | *Eugerdella* | sp. 2 | 99 | | --- | --- | --- | --- | --- | --- | --- | --- | | NB-Iso236A | 73 | BioNod´12 | f | Desmosomatidae | *Desmo. indet* |  | * | | | | | | | | |
| 24 | | NB-Iso35 | 06 | BioNod´12 | g | Desmosomatidae | *Eugerdella* | sp. 1 | 99 | | --- | --- | --- | --- | --- | --- | --- | --- | | NB-Iso380 | 43 | BioNod´12 | g | Desmosomatidae | *Eugerdella* | sp. 1 | * | | | | | | | | |
| 25 | | NB-Iso36 | 06 | BioNod´12 | g | Desmosomatidae | *Mirabilicoxa* | sp. 2 | * | | --- | --- | --- | --- | --- | --- | --- | --- | | NB-Iso386 | 43 | BioNod´12 | g | Desmosomatidae | *Mirabilicoxa* | sp. 2 | 99 | | | | | | | | |
| 26 | | NB-Iso33 | 06 | BioNod´12 | g | Desmosomatidae | *Whoia* | sp. 1 | 99 | | --- | --- | --- | --- | --- | --- | --- | --- | | NB-Iso34 | 06 | BioNod´12 | g | Desmosomatidae | *Whoia* | sp. 1 | * | | | | | | | | |
| 27 | | NB-Iso37 | 06 | BioNod´12 | g | Desmosomatidae | *Prochelator* | sp. 1 | * | | --- | --- | --- | --- | --- | --- | --- | --- | | NB-Iso239 | 73 | BioNod´12 | f | Desmosomatidae | *Prochelator* | sp. 1 | 97 | | | | | | | | |
| 28 | | NB-Iso290 | 43 | BioNod´12 | g | Nannoniscidae | *Nannoniscus* | sp. 1 | * | | --- | --- | --- | --- | --- | --- | --- | --- | | NB-Iso330 | 43 | BioNod´12 | g | Nannoniscidae | *Nannoniscus* | sp. 1 | 99 | | | | | | | | |
| 29 | | NB-Iso32 | 06 | BioNod´12 | g | Isopoda indet |  | sp.1 | * | | --- | --- | --- | --- | --- | --- | --- | --- | | NB-Iso89 | 33 | BioNod´12 | g | Isopoda indet |  | sp.1 | 99 | | | | | | | | |
